# Supplementary material
Source: publisher figshare collection journal article supplement (https://tandf.figshare.com/articles/dataset/_/9159509)
Supplement: Supplementary file 2 [file 1]

**Appendix:** List of nouns in experimental items

| Target                  | Competitor       |                |            | Distractor |
|-------------------------|------------------|----------------|------------|------------|
|                         | G+S+             | G-S+           | G-S-       |            |
| <i>Tiao</i> classifier  |                  |                |            |            |
| Fish                    | Snake            | (Toilet) Paper | Basketball | Laptop     |
| Dog                     | Rope             | Watch          | Apple      | Shoes      |
| Ship                    | Necklace         | Stocking       | Button     | Bicycle    |
| Shorts                  | Scarf            | Flag           | Gift       | Cup        |
| <i>Zhi</i> classifier   |                  |                |            |            |
| Rifle                   | Match            | Cucumber       | Photo      | Eyeglasses |
| Mobile phone            | Pen              | Key (long)     | Window     | Map        |
| Candle                  | Stick            | Small Knife    | Horse      | CD         |
| Guitar                  | Spoon            | Screwdriver    | Cake       | Radio      |
| <i>Zhang</i> classifier |                  |                |            |            |
| Bow                     | Welcome mat      | Mirror         | Umbrella   | Orange     |
| Mouth                   | Newspaper(sheet) | Towel          | Hat        | Cow        |
| Net                     | Bed              | Leaf           | Candy(box) | Taxi       |
| Sofa                    | Credit Card      | Blackboard     | Bag        | Pig        |
