# Supplementary material
Source: publisher figshare collection journal article supplement (https://tandf.figshare.com/articles/dataset/_/9159509)
Supplement: Supplementary file 3 [file 1]

## SUPPLEMENTARY MATERIALS

### **Rating Study**

The purpose of the rating study was to assess whether our selection of items for the target (G+S-) and the three competitor categories (G+S+, G-S+, G-S-) was appropriate. In particular, the rating study served to answer the following question: Are S+ items (G+S+ and G-S+ competitors) rated as better semantic fits for their respective classifier classes than S- items (G+S- targets, G-S- competitors, and G-S- distractors)? Since previous research on grammatical gender has suggested that knowledge of noun class membership can affect (native) speakers' judgment of the semantic properties of objects (Boroditsky, Schmidt, & Phillips, 2003), the rating study was conducted with speakers who had no knowledge of Chinese.

### ***Participants***

Thirty-two members of the University of Hawai'i student community completed the rating questionnaire in exchange for partial course credit. The criterion for inclusion was no knowledge of Chinese; one participant was excluded for not meeting this criterion. Data from the remaining 31 participants (mean age: 21 years; 17 females) were included in the analysis. Most ( $N = 25$ ) identified as native speakers of English; the remaining 6 listed Italian, Japanese, Korean ( $N = 2$ ), Spanish, or Tagalog as their native language.

### ***Materials and Procedure***

All 60 images that served as targets ( $k = 12$ ), competitors (G-S-:  $k = 12$ ; G-S+:  $k = 12$ ; G+S+:  $k = 12$ ), or unrelated distractors ( $k = 12$ ) in the visual-world experiment were included in the rating questionnaire. For each image, participants were asked to (i) label the object, and (ii) rate on a scale of 0-4 to what extent they felt given descriptors applied to this type of object. A sample item is provided in Figure A1. Each image appeared with the descriptors associated with the classifier in the linguistic stimulus with which the image appeared in the main visual-world experiment. For example, *wristwatch* acted as a G-S+ competitor for a target from the *tiáo* class; thus the descriptors for which it was to be rated were the semantic attributes associated with the classifier *tiáo*. Descriptors, listed in Table A1, were taken from Gao and Malt (2009, Appendix A).

72. Label the object. \*

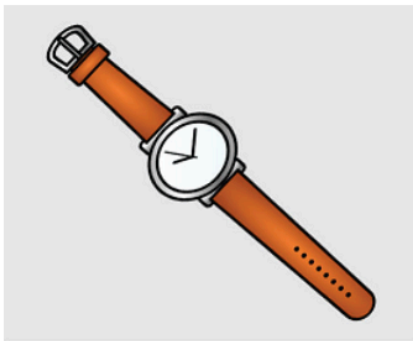

73. To what extent do you feel that the following descriptions apply to this type of object? \*

(0 = not at all; 4 = perfectly)

Mark only one oval per row.

|             | 0                     | 1                     | 2                     | 3                     | 4                     |
|-------------|-----------------------|-----------------------|-----------------------|-----------------------|-----------------------|
| slender     | <input type="radio"/> |
| long-shaped | <input type="radio"/> |
| flexible    | <input type="radio"/> |

Figure A1. Sample item from rating questionnaire.

Table A1. *Semantic attributes associated with classifiers.*

| Classifier   | Meaning associated with the classifier,<br>as listed in Gao & Malt (2009) | Descriptors listed in<br>rating questionnaire |
|--------------|---------------------------------------------------------------------------|-----------------------------------------------|
| <i>tiáo</i>  | “a slender, long-shape thing, often<br>flexible”                          | - slender<br>- long-shaped<br>- flexible      |
| <i>zhāng</i> | “to spread open/flat”                                                     | - spread-open<br>- has a flat surface         |
| <i>zhī</i>   | “a stick-like long thing”                                                 | - stick-like<br>- long                        |

### ***Analysis and Results***

Each participant’s ratings for each item were averaged over the 2 (for *zhāng* and *zhī*) or 3 (for *tiáo*) individual responses provided. For example, if a participant rated *wristwatch* as 2 for “slender”, 3 for “long-shaped”, and 2 for “flexible”, the rating for this participant-item combination that entered the analysis was 2.33.

Table A2 shows the mean ratings for each item type. These descriptive statistics show that, on average, the two S+ items were rated the highest (G+S+: 2.99, G-S+: 2.70), the two G-S- item types the lowest (competitors: .82, distractors: .71), with ratings for the G+S- target nouns (1.79) falling in between.

Table A2. *Mean ratings by item type*

| Item Type         | <i>Mean (SD) rating</i> |
|-------------------|-------------------------|
| G+S- (target)     | 1.79 (1.19)             |
| G+S+ (competitor) | 2.99 (1.02)             |
| G-S+ (competitor) | 2.70 (1.07)             |
| G-S- (competitor) | 0.82 (1.07)             |
| G-S- (distractor) | 0.71 (0.86)             |

In order to test for differences between item types, ratings were entered into a linear mixed-effects model, using the lmerTest package (Kuznetsova, Brockhoff, & Christensen, 2017) in R (R Core Team, 2018), with ItemType as a fixed effect, and participant and item as random effects, using the maximal random effects structure justified by the design (Barr, Levy, Scheepers, & Tily, 2013). The 5-level ItemType variable was treatment-coded with G-S+ as the reference level in order to test for the contrasts of key interest. Table A3 shows the fixed effect statistics from the model output.

Table A3. *Fixed effects from the linear mixed-effect model of item ratings*

|                    | <i>Estimate</i> | <i>SE</i> | <i>t</i> | <i>p</i>  |
|--------------------|-----------------|-----------|----------|-----------|
| (Intercept)        | 2.70            | 0.20      | 13.29    | <.001 *** |
| ItemType G+S-      | -0.91           | 0.24      | -3.78    | <.001 *** |
| ItemType G-S-      | -1.88           | 0.25      | -7.49    | <.001 *** |
| ItemType G+S+      | 0.29            | 0.24      | 1.21     | 0.23      |
| ItemTypeDistractor | -1.99           | 0.25      | -7.85    | <.001 *** |

*Note:* Formula:  $\text{rating} \sim \text{ItemType} + (1 + \text{ItemType} \mid \text{participant}) + (1 \mid \text{item})$

The model output shows significant negative estimates for all three S- items types (G-S- competitors and distractors, as well as G+S- targets), indicating that they were all rated as poorer semantic fits than the G-S+ competitors. Meanwhile, the difference between G+S+ and G-S+ items was not significant. These results support the key assumption underlying the Visual World experiment, namely that (G-/G+)S+ items are better aligned with the semantics of the classifier than (G-/G+)S- items.

Given the higher average ratings for G+S- targets viz-a-viz G-S- competitors and distractors, the model was rerun with different reference levels for ItemType in order to further explore differences among S- items, which were not predicted. The output from these additional models showed no significant differences between G-S- competitors and distractors ( $b = .11, p = .6$ ). However, both were rated significantly lower than the G+S- targets ( $bs > .9, ps < .001$ ). We interpret these results as a reflection of the fact that the G+S- target items are NON-PROTOTYPICAL, rather than entirely accidental, members of their classifier class. In terms of the interpretation of eye gaze patterns in the visual world experiment, these findings indicate that a preference to look at G+S- targets over G-S- competitors or distractors may not be driven purely by formal knowledge of class-membership, but could be supported, at least partially, by semantics. It is thus only a preference to look at G+S- targets over G-S+ competitors that can provide unequivocal evidence that listeners prioritize knowledge of class membership over classifier semantics during online comprehension.

## References

- Boroditsky, L., Schmidt, L. A., & Phillips, W. (2003). Sex, syntax and semantics. In D. Gentner & S. Goldin-Meadow (Eds.), *Language in mind: Advances in the study of language and thought* (pp. 61-79). Cambridge, MA: MIT Press.
- Gao, M. Y., & Malt, B. C. (2009). Mental representation and cognitive consequences of Chinese individual classifiers. *Language and Cognitive Processes*, 24, 1124-1179.
- Kuznetsova, A, Brockhoff, P. B., & Christensen, R. H. B. (2017). lmerTest Package: Tests in Linear Mixed Effects Models. *Journal of Statistical Software*, 82, 1–26.
- R Core Team (2018). R: A language and environment for statistical computing. R Foundation for Statistical Computing, Vienna, Austria. URL <https://www.R-project.org/>.
